# Supplementary material for: Development of Population-Based Cancer Indicators and a Measurement of Cancer Care Continuum Using a Modified Delphi Method
Source: MDPI journal article supplement (doi:10.3390/cancers13194826), 2021-09-27
Supplement: s1 [file s1]

**Supplementary Table S1. Characteristics of the National and International Cancer guidelines**

| Level                    | Cancer Guidelines and Reports                                                                    | Organization                                                                      | Publication | Population Coverage | No.of Indicators |
|--------------------------|--------------------------------------------------------------------------------------------------|-----------------------------------------------------------------------------------|-------------|---------------------|------------------|
| International Guidelines | Cancer control and world cancer report (46)                                                      | International Agency for Research on Cancer (IARC)                                | 2009-2019   | International       | 127              |
|                          | Canadian cancer society (47)                                                                     | CANADA                                                                            | 2015-2019   | National, Regional  | 122              |
|                          | European guide for quality national cancer control programs (48)                                 | Europe                                                                            | 2013-2019   | National            | 101              |
|                          | National cancer care plan (49)                                                                   | The Organization for Economic Co-operation and Development (OECD)                 | 2013-2019   | International       | 150              |
|                          | Quality oncology practice initiative (50)                                                        | American Society of Clinical Oncology (ASCO)                                      | 2013-2019   | National            | 98               |
|                          | Scottish cancer task force national cancer quality steering group guidelines and indicators (51) | National Health Service (NHS)                                                     | 2013-2020   | National            | 116              |
|                          | WHO-Cancer care Report for ALL (52)                                                              | World Health Organization (WHO)                                                   | 2005-2020   | International       | 268              |
|                          | National cancer registration hospitals such as cancer treatment-linked hospitals (53)            | Center for Cancer Control and Information Services, National Cancer Center- Japan | 2017        | National            | 12               |
|                          | Cancer hospital- five-year survival rate report 2010-2011 (54)                                   |                                                                                   | 2019        | National            | 12               |
|                          | Cancer care linked hospital- Survival rate report – 2013 (55)                                    |                                                                                   | 2019        | Regional            | 7                |
|                          | Cancer statistics 2019 (56)                                                                      |                                                                                   | 2019        | National            | 25               |
|                          | National screening programme DATA book (57)                                                      |                                                                                   | 2020        | National            | 7                |
|                          | Monitoring of cancer incidence in Japan (58)                                                     |                                                                                   | 2019        | National            | 15               |
|                          | Cancer incidence rate in Japan (59)                                                              | Cancer and Disease Control Division, Ministry of Health, Labor and Welfare-Japan  | 2020        | National            | 4                |
| National Guidelines      | Cancer statistics (60)                                                                           | National Cancer Center (NCC) Korea                                                | 2007-2020   | National            | 9                |
|                          | Measures to improve the classification system and evaluation of health indicators (61)           | Health Insurance Review and Assessment Service Korea                              | 2019        | Regional            | 1                |
|                          | Regional health index (62)                                                                       | Korea Health Ranking (Elio & company)                                             | 2018        | Regional            | 1                |
|                          | Regional health vulnerable indicators (63)                                                       | Korea Health Promotion Institute                                                  | 2016        | Regional            | 8                |
|                          | Community health Survey – Health indicators (64)                                                 | Hallym University                                                                 | 2013        | Regional            | 5                |
|                          | Community health Survey (65)                                                                     | Center for Disease Control Korea                                                  | 2008-2019   | Regional            | 28               |
